# Supplementary material for: A functional network perspective on response inhibition and attentional control
Source: PubMed Central journal article supplement — Nat Commun. 2014 Jun 6;5:4073. doi: 10.1038/ncomms5073 (PMC4059922; doi:10.1038/ncomms5073), 2014-06-06
Supplement: ncomms5073-s1.pdf [file ncomms5073-s1.pdf]

**Supplementary Figure 1 – Voxelwise whole brain analysis of RIAFO seeded PPI**

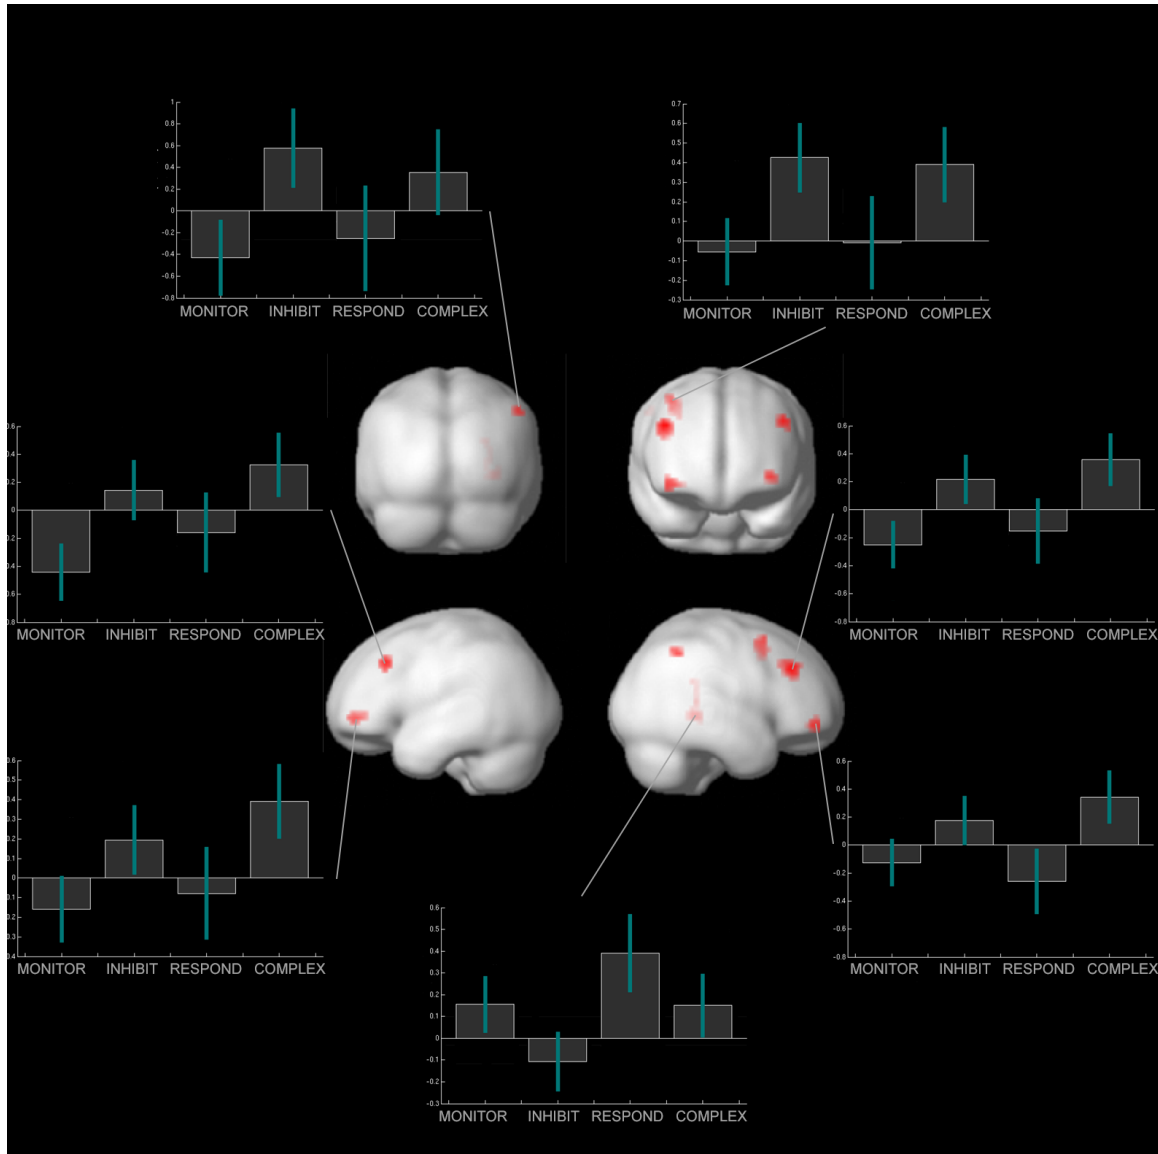

There was no significant main effect of task at the whole brain corrected threshold of  $p < 0.05$  FDR corrected. Several clusters were evident at the liberal uncorrected threshold of  $p < 0.01$  one-tailed. However, none of the regions showed heightened PPI for the INHIBITION task specifically, with similar effects evident for the COMPLEX task. Error bars represent the 90% confidence interval. F test with  $N = 16$  participants and 4 conditions (task).

**Supplementary Table 1 – Activation coordinates for ICA seed analysis**

| ROI<br>Seed | Regions                      | Peak MNI<br>Coordinates |     |     |       |
|-------------|------------------------------|-------------------------|-----|-----|-------|
|             |                              | x                       | y   | z   | t     |
| C1          | Left aLOFC                   | -39                     | 54  | -12 | 12.79 |
| C2          | Left AIFO                    | -30                     | 24  | 3   | 19.46 |
|             | ACC/preSMA                   | 6                       | 9   | 51  | 9.26  |
| C3          | Left Superior Frontal Sulcus | -27                     | 36  | 30  | 20.47 |
|             | Left Putamen                 | -24                     | -15 | 6   | 9.80  |
|             | Right Putamen                | 30                      | -6  | 9   | 8.80  |
|             | Supplemental Motor Area      | -3                      | -3  | 51  | 11.49 |
|             | Left Middle Frontal Gyrus    | -42                     | 18  | 45  | 11.67 |
|             | Right Middle Frontal Gyrus   | 42                      | 24  | 45  | 8.53  |
| C4          | Left pLOFC                   | -48                     | 24  | -3  | 11.83 |
|             | Superior Frontal Gyrus       | 6                       | 57  | 24  | 6.87  |
|             | Left Middle Temporal Gyrus   | -54                     | -3  | -15 | 7.82  |
|             | Right Middle Temporal Gyrus  | 51                      | -6  | -18 | 6.38  |
|             | Left Angular Gyrus           | -57                     | -57 | 21  | 7.30  |
|             | Right Angular Gyrus          | 57                      | -51 | 21  | 6.35  |
| C5          | Left Lateral Frontal Pole    | -36                     | 51  | -3  | 7.96  |
| C6          | Rostrolateral Frontal Cortex | -42                     | 45  | 15  | 6.22  |
|             | Right Supramarginal Gyrus    | 57                      | -39 | 48  | 6.81  |
| C7          | Left IFS                     | -45                     | 30  | 15  | 12.98 |
|             | Left Parietal Cortex         | -33                     | -63 | 45  | 6.43  |
|             | Right Parietal Cortex        | 33                      | -69 | 36  | 6.17  |

N =16 participants with 1 condition (averaged across task)

**Supplementary Table 2 – ROI results from PPI analysis**

**a) Positive effect of condition**

| <b>ROI</b> | <b>t</b> | <b>p(one tailed)</b> |
|------------|----------|----------------------|
| Left STN   | 3.160    | 0.001                |
| Right STN  | 2.590    | 0.006                |
| SMC1       | 2.250    | 0.014                |
| SMC2       | 1.800    | 0.039                |
| SMC3       | 3.090    | 0.002                |

**b) Main effect of task**

| <b>ROI</b> | <b>F</b> | <b>p</b> |
|------------|----------|----------|
| Left STN   | 0.500    | 0.687    |
| Right STN  | 1.210    | 0.316    |
| SMC1       | 0.660    | 0.583    |
| SMC2       | 0.190    | 0.906    |
| SMC3       | 0.300    | 0.824    |

N =16 participants with 4 conditions (task)

**Supplementary Table 3 - correlations with SSRT**

Correlation with SSRT

| a | Transient activations | Rho                 | p(1-tailed)  |
|---|-----------------------|---------------------|--------------|
|   | aLOFC                 | -0.390              | 0.068        |
|   | AIFO                  | 0.200               | 0.229        |
|   | SFS                   | 0.093               | 0.366        |
|   | pLOFC                 | 0.576               | <b>0.01*</b> |
|   | FPC                   | -0.265              | 0.161        |
|   | RLPFC                 | -0.174              | 0.260        |
|   | IFS                   | 0.132               | 0.313        |
| b | PPI                   |                     |              |
|   |                       | Right AIFO seed PPI |              |
|   |                       | Rho                 | p(1-tailed)  |
|   | aLOFC                 | -0.494              | <b>0.026</b> |
|   | SFS                   | -0.365              | 0.082        |
|   | pLOFC                 | -0.565              | <b>0.011</b> |
|   | FPC                   | -0.503              | <b>0.024</b> |
|   | RLPFC                 | -0.094              | 0.364        |
|   | IFS                   | -0.182              | 0.25         |
|   | SMC1                  | -0.638              | <b>0.004</b> |
|   | SMC2                  | -0.203              | 0.225        |
|   | SMC3                  | -0.521              | <b>0.019</b> |
|   |                       | Left AIFO seed      |              |
|   |                       | Rho                 | p(1-tailed)  |
|   | aLOFC                 | -0.468              | <b>0.034</b> |
|   | SFS                   | -0.232              | 0.193        |
|   | pLOFC                 | -0.618              | <b>0.005</b> |
|   | FPC                   | -0.403              | 0.061        |
|   | RLPFC                 | 0.032               | 0.453        |
|   | IFS                   | 0.053               | 0.423        |
|   | SMC1                  | -0.356              | 0.088        |
|   | SMC2                  | -0.356              | 0.088        |
|   | SMC3                  | -0.506              | <b>0.023</b> |
|   |                       | preSMA seed         |              |
|   |                       | Rho                 | p(1-tailed)  |
|   | aLOFC                 | -0.476              | <b>0.031</b> |
|   | SFS                   | -0.003              | 0.496        |
|   | pLOFC                 | -0.335              | 0.102        |
|   | FPC                   | -0.444              | <b>0.042</b> |
|   | RLPFC                 | -0.374              | 0.077        |
|   | IFS                   | -0.441              | <b>0.044</b> |
|   | SMC1                  | -0.303              | 0.127        |
|   | SMC2                  | 0.171               | 0.264        |
|   | SMC3                  | -0.168              | 0.267        |

N =16 participants with 1 condition (INHIBITION task) - numbers in bold are significant at p<0.05 1 tailed

\*Opposite direction of effect to predicted

**Supplementary Table 4 – MNI coordinates for the individually defined STN ROIs**

| X  | Y   | Z   | Participant | Hemisphere |
|----|-----|-----|-------------|------------|
| -6 | -18 | -12 | 1           | Left       |
| -6 | -15 | -6  | 2           |            |
| -6 | -18 | -6  | 3           |            |
| -6 | -15 | -9  | 4           |            |
| -6 | -15 | -6  | 5           |            |
| -9 | -15 | -3  | 6           |            |
| -6 | -15 | -6  | 7           |            |
| -9 | -15 | -6  | 8           |            |
| -6 | -15 | -9  | 9           |            |
| -9 | -15 | -6  | 10          |            |
| -9 | -18 | -6  | 11          |            |
| -9 | -15 | -6  | 12          |            |
| -6 | -15 | -6  | 13          |            |
| -6 | -15 | -6  | 14          |            |
| -6 | -15 | -9  | 15          |            |
| -6 | -15 | -6  | 16          |            |
| 9  | -18 | -12 | 1           | Right      |
| 9  | -15 | -6  | 2           |            |
| 6  | -18 | -9  | 3           |            |
| 6  | -15 | -9  | 4           |            |
| 9  | -15 | -9  | 5           |            |
| 9  | -18 | -3  | 6           |            |
| 6  | -15 | 6   | 7           |            |
| 12 | -15 | -6  | 8           |            |
| 6  | -15 | -9  | 9           |            |
| 9  | -15 | -6  | 10          |            |
| 9  | -15 | -6  | 11          |            |
| 9  | -15 | -6  | 12          |            |
| 9  | -15 | -6  | 13          |            |
| 6  | -15 | -9  | 14          |            |
| 6  | -15 | -9  | 15          |            |
| 9  | -15 | -6  | 16          |            |
